# Supplementary material for: The Psychological Impact of Strict and Prolonged Confinement on Business Students during the COVID-19 Pandemic at a Spanish University
Source: MDPI journal article supplement (doi:10.3390/ijerph18041710), 2021-02-10
Supplement: s1 [file s1]

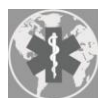

Article

# The psychological impact of strict and prolonged confinement on business students during the COVID-19 pandemic at a Spanish university

## Supplementary Material:

**Table S1.** Association between GAD-7 and being affected negatively by the state of alarm by Covid-19 (confinement)

| Anxiety level | Affected negatively by confinement |               |                              |    |       |
|---------------|------------------------------------|---------------|------------------------------|----|-------|
|               | Yes, a lot                         | Yes, somewhat | Yes, but only in a small way | No | Total |
| Normal        | 5                                  | 5             | 6                            | 6  | 22    |
| Mild          | 18                                 | 29            | 17                           | 3  | 67    |
| Moderate      | 21                                 | 45            | 5                            | 1  | 72    |
| Severe        | 19                                 | 16            | 0                            | 2  | 37    |
| Total         | 63                                 | 95            | 28                           | 12 | 198   |

**Table S2.** Association between GAD-7 and immediate family income affected negatively

| Anxiety level | Affected | Not affected | Total |
|---------------|----------|--------------|-------|
| Normal        | 11       | 11           | 22    |
| Mild          | 37       | 30           | 67    |
| Moderate      | 49       | 23           | 72    |
| Severe        | 27       | 10           | 37    |
| Total         | 124      | 74           | 198   |

**Table S3.** Association between GAD-7 and feeling fear

| Anxiety level | Feeling fear |                           |                           |       |       |
|---------------|--------------|---------------------------|---------------------------|-------|-------|
|               | Always       | More than 50% of the time | Less than 50% of the time | Never | Total |
| Normal        | 0            | 1                         | 8                         | 13    | 22    |
| Mild          | 0            | 17                        | 38                        | 11    | 67    |
| Moderate      | 1            | 28                        | 40                        | 3     | 72    |

|        |   |    |    |    |      |
|--------|---|----|----|----|------|
| Severe | 3 | 19 | 11 | 1  | 37   |
| Total  | 4 | 65 | 97 | 28 | 198* |

\*Four values lost

**Table S4. Association between GAD-7 and negatively affected sleep patterns**

| Anxiety level | Negatively affected sleep patterns |                  |                           |                           |            |       | Total |
|---------------|------------------------------------|------------------|---------------------------|---------------------------|------------|-------|-------|
|               | Always                             | Most of the time | More than 50% of the time | Less than 50% of the time | Some-times | Never |       |
| Normal        | 1                                  | 3                | 1                         | 0                         | 8          | 9     | 22    |
| Mild          | 9                                  | 20               | 7                         | 10                        | 12         | 9     | 67    |
| Moderate      | 20                                 | 21               | 10                        | 4                         | 10         | 6     | 72    |
| Severe        | 20                                 | 10               | 4                         | 3                         | 0          | 0     | 37    |
| Total         | 50                                 | 54               | 22                        | 17                        | 30         | 24    | 198*  |

\*One value lost

**Table S5. Association between GAD-7 and relationship with family**

| Anxiety level | Level of satisfaction with family relationship |                |                    |                                       |                    |                      | Total |
|---------------|------------------------------------------------|----------------|--------------------|---------------------------------------|--------------------|----------------------|-------|
|               | Completely satisfied                           | Very satisfied | Somewhat satisfied | Neither satisfied or nor dissatisfied | Not very satisfied | Not satisfied at all |       |
| Normal        | 12                                             | 5              | 3                  | 0                                     | 2                  | 0                    | 22    |
| Mild          | 27                                             | 29             | 9                  | 0                                     | 1                  | 0                    | 67    |
| Moderate      | 20                                             | 27             | 14                 | 4                                     | 6                  | 1                    | 72    |
| Severe        | 7                                              | 13             | 3                  | 4                                     | 9                  | 0                    | 37    |
| Total         | 66                                             | 74             | 29                 | 8                                     | 18                 | 1                    | 198*  |

\*Two values lost

**Table S6. Association between GAD-7 and if their habits help them during this period**

| Anxiety level |                | Habits help them during this period |               |                        |                |                       |                  |       |  |
|---------------|----------------|-------------------------------------|---------------|------------------------|----------------|-----------------------|------------------|-------|--|
|               | Extremely true | True most ways                      | Somewhat true | Neither true nor false | Somewhat false | False in all contexts | Completely false | Total |  |
| Normal        | 6              | 10                                  | 4             | 2                      | 0              | 0                     | 0                | 22    |  |
| Mild          | 17             | 21                                  | 18            | 6                      | 3              | 1                     | 1                | 67    |  |
| Moderate      | 9              | 19                                  | 25            | 7                      | 6              | 5                     | 1                | 72    |  |
| Severe        | 2              | 9                                   | 13            | 5                      | 5              | 1                     | 2                | 37    |  |
| Total         | 34             | 59                                  | 60            | 20                     | 14             | 7                     | 4                | 198   |  |

Table S7. Association between GAD-7 and feel calm and relaxed

| Anxiety level | Feel calm and relaxed |                  |                           |                           |            |       |       |
|---------------|-----------------------|------------------|---------------------------|---------------------------|------------|-------|-------|
|               | All the time          | Most of the time | More than 50% of the time | Less than 50% of the time | Some-times | Never | Total |
| Normal        | 3                     | 10               | 4                         | 4                         | 1          | 0     | 22    |
| Mild          | 1                     | 9                | 14                        | 20                        | 21         | 2     | 67    |
| Moderate      | 0                     | 3                | 10                        | 21                        | 33         | 5     | 72    |
| Severe        | 0                     | 0                | 1                         | 4                         | 17         | 15    | 37    |
| Total         | 4                     | 22               | 29                        | 49                        | 72         | 22    | 198   |

Table S8. Association between GAD-7 with the death of a relative or a friend.

| Anxiety level | Death of a relative or a friend. |              |       |          |              |       |
|---------------|----------------------------------|--------------|-------|----------|--------------|-------|
|               | Relative                         |              |       | Friend   |              |       |
|               | Affected                         | Not affected | Total | Affected | Not affected | Total |
| Normal        | 1                                | 21           | 22    | 2        | 20           | 22    |
| Mild          | 5                                | 62           | 67    | 5        | 62           | 67    |
| Moderate      | 8                                | 64           | 72    | 5        | 67           | 72    |
| Severe        | 3                                | 34           | 37    | 1        | 36           | 37    |
| Total         | 17                               | 181          | 198   | 13       | 185          | 198   |
